# Supplementary material
Source: MDPI journal article supplement (https://www.mdpi.com/2673-8112/3/5/54)
Supplement: s1 [file s1 › covid-2311842-supplementary.pdf]

## Supplement

### *Derivation of Equation (2) in the Main Text*

Let  $p$  (where  $1 > p > 0$ ) denote the proportion of individuals in the entire population who are COVID-19 cases, that is, the *prevalence* of COVID-19. Let  $q$  (where  $1 > q > 0$ ) denote the proportion of all COVID-19 cases that are *severe*, that is, hospitalized *because* of their illness. We make the key assumption that those individuals without COVID-19 have the same probability  $g$  of hospitalization (where  $1 > g > 0$ ) as those with non-severe COVID-19. The proportion of individuals in the population who do not have COVID-19 *and* are hospitalized is thus  $g(1 - p)$ . The proportion who have non-severe COVID-19 *and* are incidentally hospitalized as  $g(1 - q)p$ , while the proportion who have severe COVID-19 *and* are hospitalized as  $qp$ .

Let  $c$  (where  $1 > c > 0$ ) denote the fraction of all hospitalized individuals who are COVID-19-positive, whether those individuals are severe or non-severe cases. Utilizing the foregoing expressions, we have  $c = \frac{g(1-q)p+qp}{g(1-p)+(1-q)p+qp}$ . We can write the odds that a hospitalized patient is COVID-positive as  $\frac{c}{1-c} = \frac{g(1-q)p+qp}{g(1-p)}$ , which can be rewritten as  $\left(\frac{p(1-q)}{1-p}\right)\left(\frac{g(1-q)+q}{g(1-q)}\right)$ . Utilizing the definition of  $\pi$  in equation (1) in the main text and rearranging terms gives:

$$\pi = (1 - q) \left( \frac{p}{1 - p} \right) / \left( \frac{c}{1 - c} \right) \quad (2).$$

### *Derivation of Equation (3) in the Main Text*

Let  $h(t)$  denote the incidence rate of SARS-CoV-2 infection at time  $t \geq 0$ . We assume that incidence is growing exponentially, that is,  $h(t) = h_0 e^{\rho t}$ , where  $h_0, \rho > 0$ . Let the duration  $s > 0$  of infection have an exponential distribution with mean  $1/\theta$ , where  $\theta > 0$ , so that the cumulative distribution function of  $s$  is  $F(s) = 1 - e^{-\theta s}$  and the corresponding survival function is  $G(s) = 1 - F(s) = e^{-\theta s}$ . Given these functional forms for  $h$  and  $G$ , the prevalence of COVID-19 at time  $t$  is  $p(t) = \int_0^t h(u)G(t - u) du = \frac{h_0}{\rho + \theta} (e^{\rho t} - e^{-\theta t})$ . For sufficiently large  $t$ , the second term inside the parentheses gets small, so that we have:

$$p(t) \approx \frac{1}{\rho + \theta} h(t) \quad (3).$$

Tables

**Table S1. Data Underlying Figure 2. <sup>a</sup>**

| <i>Week Ending</i> | <i>Total Hospital Inpatients</i> | <i>COVID-19 Positive Inpatients</i> | <i>Percent COVID-19 Positive (c)</i> |
|--------------------|----------------------------------|-------------------------------------|--------------------------------------|
| 6/25/21            | 103,859                          | 2,409                               | 2.32                                 |
| 7/2/21             | 102,030                          | 2,652                               | 2.60                                 |
| 7/9/21             | 105,387                          | 3,426                               | 3.25                                 |
| 7/16/21            | 106,785                          | 4,857                               | 4.55                                 |
| 7/23/21            | 107,265                          | 7,354                               | 6.86                                 |
| 7/30/21            | 107,556                          | 10,500                              | 9.76                                 |
| 8/6/21             | 107,758                          | 13,875                              | 12.88                                |
| 8/13/21            | 108,483                          | 16,537                              | 15.24                                |
| 8/20/21            | 108,509                          | 18,079                              | 16.66                                |
| 8/27/21            | 108,193                          | 18,115                              | 16.74                                |
| 9/3/21             | 107,151                          | 17,575                              | 16.40                                |
| 9/10/21            | 109,515                          | 16,130                              | 14.73                                |
| 9/17/21            | 108,878                          | 14,470                              | 13.29                                |
| 9/24/21            | 108,083                          | 12,598                              | 11.66                                |
| 10/1/21            | 107,455                          | 10,793                              | 10.04                                |
| 10/8/21            | 107,605                          | 9,480                               | 8.81                                 |
| 10/15/21           | 107,123                          | 8,348                               | 7.79                                 |
| 10/22/21           | 107,114                          | 7,261                               | 6.78                                 |
| 10/29/21           | 106,776                          | 6,774                               | 6.34                                 |
| 11/5/21            | 107,227                          | 6,426                               | 5.99                                 |
| 11/12/21           | 107,658                          | 6,646                               | 6.17                                 |
| 11/19/21           | 105,426                          | 7,083                               | 6.72                                 |
| 11/26/21           | 104,164                          | 7,897                               | 7.58                                 |
| 12/3/21            | 109,395                          | 8,962                               | 8.19                                 |
| 12/10/21           | 109,638                          | 9,873                               | 9.01                                 |
| 12/17/21           | 107,399                          | 10,616                              | 9.88                                 |
| 12/24/21           | 101,122                          | 13,797                              | 13.64                                |
| 12/31/21           | 106,676                          | 21,126                              | 19.80                                |
| 1/7/22             | 109,725                          | 27,621                              | 25.17                                |

a. Total Hospital Inpatients and COVID-19 Positive Inpatients are 7-day averages.  $c = 100 \times (\text{COVID-19 Positive}) \div (\text{Total Inpatients})$ . Source: U.S. Department of Health and Human Services [26].

## Figures

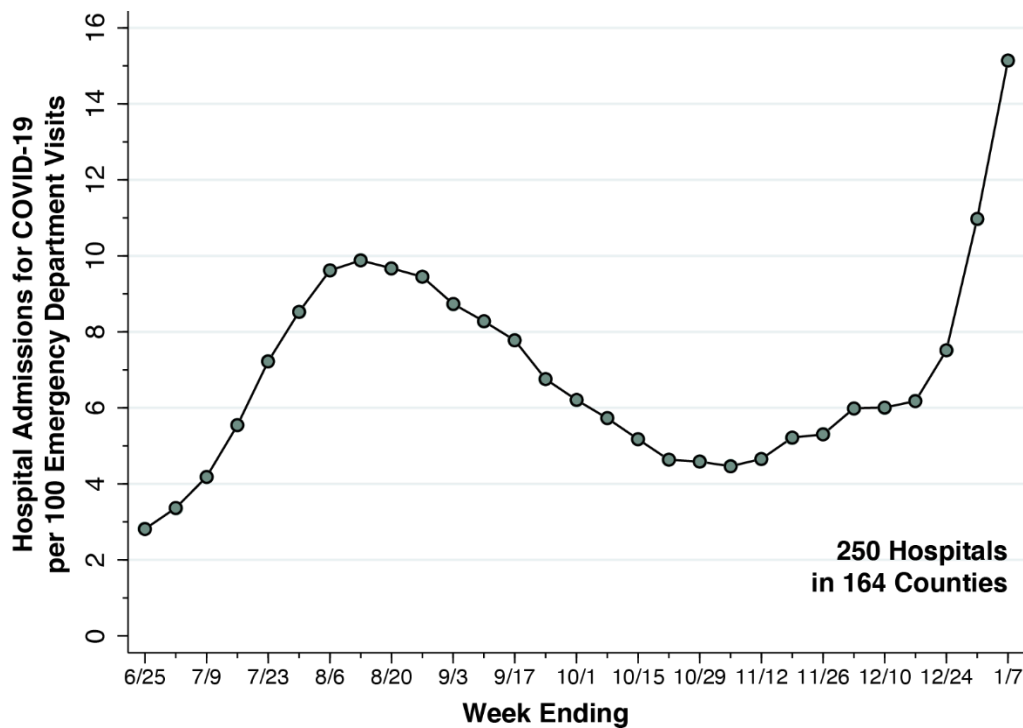

**Figure S1. Hospital Admissions for COVID-19 per 100 Emergency Department Visits in a Cohort of 250 High-Volume Hospitals, Weeks Ending June 25, 2021, through January 7, 2022.** See Technical Notes to Figure S1 below.

### Technical Notes to Figure S1.

The data source was U.S. Department of Health and Human Services [26], as described under *Data: Cohort of 250 High-Volume Hospitals* in the section on Methods and Data in the main text.

Emergency department visits to each of the cohort hospitals was derived from the variable *previous\_day\_covid\_ED\_visits\_7\_day\_sum*, defined as “Sum of total number of ED visits who were seen on the previous calendar day who had a visit related to COVID-19 (meets suspected or confirmed definition or presents for COVID diagnostic testing – do not count patients who present for pre-procedure screening) reported in 7-day period.”

Hospital admissions were determined as the sum of two variables:

- previous\_day\_admission\_adult\_covid\_confirmed\_7\_day\_sum*, defined as “Sum of number of patients who were admitted to an adult inpatient bed on the previous calendar

day who had confirmed COVID-19 at the time of admission reported in the 7-day period.”

- b) *previous\_day\_admission\_pediatric\_covid\_confirmed\_7\_day\_sum*, defined as “Sum of number of pediatric patients who were admitted to an inpatient bed, including NICU, PICU, newborn, and nursery, on the previous calendar day who had confirmed COVID-19 at the time of admission.”
